# Supplementary material for: Association Between Hormone Therapy and Muscle Mass in Postmenopausal Women: A Systematic Review and Meta-analysis
Source: PubMed Central journal article supplement (PMC6716293; doi:10.1001/jamanetworkopen.2019.10154), 2019-08-28
Supplement: jamanetwopen-2-e1910154-s001.pdf [file jamanetwopen-2-e1910154-s001.pdf]

## Supplementary Online Content

Javed AA, Mayhew AJ, Shea AK, Raina P. Association between hormone therapy and muscle mass in postmenopausal women: a systematic review and meta-analysis. *JAMA Netw Open*. 2019;2(8):e1910154. doi:10.1001/jamanetworkopen.2019.10154

**eTable 1.** Electronic Search Strategies for Databases MEDLINE, Embase, AgeLine, CINAHL, and SportDiscus

**eTable 2.** Estrogen Dose Equivalence Calculations

**eTable 3.** Study Characteristics (Part 1)

**eTable 4.** Study Characteristics (Part 2)

**eTable 5.** Study Characteristics (Part 3)

**eTable 6.** Risk of Bias Assessment

**eTable 7.** Summary Meta-analysis of the Association Between Less Than 0.625 mg Estrogen-Only Treatment and Muscle Mass Outcomes

**eTable 8.** Summary Meta-analysis of the Association Between 0.625 mg or More Estrogen-Only Treatment and Muscle Mass Outcomes

**eTable 9.** Summary Meta-analysis of the Association Between Less than 0.625 mg Estrogen + Any Dose Progesterone Treatment and Muscle Mass Outcomes

**eTable 10.** Summary Meta-analysis of the Association Between 0.625 mg or More Estrogen + Any Dose Progesterone Treatment and Muscle Mass Outcomes

**eTable 11.** Summary Meta-analysis of the Association Between Shorter Follow-up Lengths and Muscle Mass Outcomes

**eTable 12.** Summary Meta-analysis of the Association Between Longer Follow-up Lengths and Muscle Mass Outcomes

**eTable 13.** Summary Meta-analysis of Studies With <10 Years of Time Since Menopause

**eTable 14.** Summary Meta-analysis of the Association Between Shorter Times Since Menopause and Muscle Mass Outcomes

**eTable 15.** Summary Meta-analysis of the Association Between Longer Times Since Menopause and Muscle Mass Outcomes

**eTable 16.** Summary Meta-analysis of the Association Between Fair/Good Study Quality and Muscle Mass Outcomes

**eTable 17.** Summary Meta-analysis of the Association Between Poor Study Quality and Muscle Mass Outcomes

**eTable 18.** Summary Meta-analysis of the Association Between DEXA Measurement and Muscle Mass Outcomes

**eTable 19.** Summary Meta-analysis of the Association Between Other Measurement and Muscle Mass Outcomes

**eTable 20.** GRADE Assessment

**eFigure.** Funnel Plot for Assessment of Publication Bias

This supplementary material has been provided by the authors to give readers additional information about their work.

**eTable 1.** Electronic Search Strategies for Databases MEDLINE, Embase, AgeLine, CINAHL, and SportDiscus

| Database | Search strategy |                                                                       | Results (n) |
|----------|-----------------|-----------------------------------------------------------------------|-------------|
|          | #               | Search term                                                           |             |
| MEDLINE  | 1               | exp Hormone Replacement Therapy/ or hormon* replacement therap*.mp.   | 30785       |
|          | 2               | (hormon* adj2 therap*).mp.                                            | 45612       |
|          | 3               | (hormon* adj2 replac*).mp.                                            | 23721       |
|          | 4               | HRT.mp.                                                               | 9782        |
|          | 5               | (hormon* adj2 supplement*).mp.                                        | 1344        |
|          | 6               | exp Estrogen Replacement Therapy/ or estrogen replacement therap*.mp. | 17068       |
|          | 7               | (estrogen adj2 therap*).mp.                                           | 20357       |
|          | 8               | estrogen.mp. or exp Estrogens/                                        | 244557      |
|          | 9               | progestin.mp. or exp Progestins/                                      | 75022       |
|          | 10              | estrogen-progestin.mp.                                                | 1246        |
|          | 11              | exp Body Composition/ or body compos*.mp.                             | 613379      |
|          | 12              | 1 or 2 or 3 or 4 or 5 or 6 or 7 or 8 or 9 or 10                       | 313714      |
|          | 13              | exp Muscle, Skeletal/ or muscle mass.mp.                              | 263546      |
|          | 14              | 11 or 13                                                              | 318151      |
|          | 15              | 12 and 14                                                             | 4026        |
| Embase   | 1               | exp Hormone Replacement Therapy/ or hormon* replacement therap*.mp.   | 58601       |
|          | 2               | (hormon* adj2 therap*).mp.                                            | 83063       |
|          | 3               | (hormon* adj2 replac*).mp.                                            | 23065       |
|          | 4               | HRT.mp.                                                               | 12942       |
|          | 5               | (hormon* adj2 supplement*).mp.                                        | 1503        |
|          | 6               | exp Estrogen Replacement Therapy/ or estrogen replacement therap*.mp. | 24309       |
|          | 7               | (estrogen adj2 therap*).mp.                                           | 26872       |
|          | 8               | estrogen.mp. or exp Estrogens/                                        | 338741      |
|          | 9               | progestin.mp. or exp Progestins/                                      | 166652      |
|          | 10              | estrogen-progestin.mp.                                                | 1325        |
|          | 11              | exp Body Composition/ or body compos*.mp.                             | 88524       |
|          | 12              | 1 or 2 or 3 or 4 or 5 or 6 or 7 or 8 or 9 or 10                       | 476514      |
|          | 13              | exp Muscle, Skeletal/ or muscle mass.mp.                              | 295471      |
|          | 14              | 11 or 13                                                              | 373975      |
|          | 15              | 12 and 14                                                             | 7475        |
| AgeLine  | 1               | (MH "Hormone Replacement Therapy+") OR "hormon* replacement therap**" | 454         |
|          | 2               | "hrt"                                                                 | 158         |
|          | 3               | "hormon* n2 supplement**"                                             | 50          |
|          | 4               | "estrogen replacement therap**"                                       | 72          |
|          | 5               | "hormon* n2 therap**"                                                 | 0           |
|          | 6               | "hormon* n2 replac**"                                                 | 0           |
|          | 7               | (MH "Estrogens+") OR "estrogen"                                       | 452         |

|                    |    |                                                                      |       |
|--------------------|----|----------------------------------------------------------------------|-------|
|                    | 8  | “estrogen n2 therap*”                                                | 26    |
|                    | 9  | (MH “Progestational Hormones+”) OR “progestin”                       | 32    |
|                    | 10 | “estrogen-progestin”                                                 | 14    |
|                    | 11 | (MH “Body Composition+”) OR “body compos*”                           | 422   |
|                    | 12 | “muscle mass” OR (MH “Muscle, Skeletal+”)                            | 234   |
|                    | 13 | S1 or S2 or S3 or S4 or S5 or S6 or S7 or S8 or S9 or S10            | 749   |
|                    | 14 | S11 or S12                                                           | 605   |
|                    | 15 | S13 and S14                                                          | 16    |
| <b>CINAHL</b>      | 1  | (MH “Hormone Replacement Therapy+”) OR “hormon* replacement therap*” | 7332  |
|                    | 2  | “hrt”                                                                | 1363  |
|                    | 3  | “hormon* n2 supplement*”                                             | 0     |
|                    | 4  | “estrogen replacement therap*”                                       | 315   |
|                    | 5  | “hormon* n2 therap*”                                                 | 0     |
|                    | 6  | “hormon* n2 replac*”                                                 | 0     |
|                    | 7  | (MH “Estrogens+”) OR “estrogen”                                      | 11378 |
|                    | 8  | “estrogen n2 therap*”                                                | 0     |
|                    | 9  | (MH “Progestational Hormones+”) OR “progestin”                       | 3178  |
|                    | 10 | “estrogen-progestin”                                                 | 211   |
|                    | 11 | (MH “Body Composition+”) OR “body compos*”                           | 12555 |
|                    | 12 | “muscle mass” OR (MH “Muscle, Skeletal+”)                            | 24568 |
|                    | 13 | S1 or S2 or S3 or S4 or S5 or S6 or S7 or S8 or S9 or S10            | 16947 |
|                    | 14 | S11 or S12                                                           | 35787 |
|                    | 15 | S13 and S14                                                          | 400   |
| <b>SportDiscus</b> | 1  | (MH “Hormone Replacement Therapy+”) OR “hormon* replacement therap*” | 388   |
|                    | 2  | “hrt”                                                                | 261   |
|                    | 3  | “hormon* n2 supplement*”                                             | 1     |
|                    | 4  | “estrogen replacement therap*”                                       | 60    |
|                    | 5  | “hormon* n2 therap*”                                                 | 0     |
|                    | 6  | “hormon* n2 replac*”                                                 | 1     |
|                    | 7  | (MH “Estrogens+”) OR “estrogen”                                      | 1856  |
|                    | 8  | “estrogen n2 therap*”                                                | 0     |
|                    | 9  | (MH “Progestational Hormones+”) OR “progestin”                       | 83    |
|                    | 10 | “estrogen-progestin”                                                 | 19    |
|                    | 11 | (MH “Body Composition+”) OR “body compos*”                           | 11308 |
|                    | 12 | “muscle mass” OR (MH “Muscle, Skeletal+”)                            | 2740  |
|                    | 13 | S1 or S2 or S3 or S4 or S5 or S6 or S7 or S8 or S9 or S10            | 2441  |
|                    | 14 | S11 or S12                                                           | 13527 |
|                    | 15 | S13 and S14                                                          | 102   |

**eTable 2.** Estrogen Dose Equivalence Calculations  
Reference values<sup>1-3</sup>:

| Estrogen                                                  | Estrogen dose for bone endpoints |     |                |      |
|-----------------------------------------------------------|----------------------------------|-----|----------------|------|
|                                                           | Ultra-Low                        | Low | Standard       | High |
| Conjugated equine estrogens (mg)                          | 0.15                             | 0.3 | 0.625          | 1.25 |
| Micronized 17β-estradiol (mg)                             | 0.5                              |     | 1 <sup>4</sup> | 4    |
| Estradiol valerate (mg)                                   |                                  | 1   | 2              |      |
| Transdermal 17β-estradiol (Estraderm) (mg) <sup>5,6</sup> |                                  |     | 0.05           |      |

**Calculations:**

| Study                                                 | Estrogen type    | Name                                                   | Dose                                                                                                                  | Standardized to CEE's                                                    |
|-------------------------------------------------------|------------------|--------------------------------------------------------|-----------------------------------------------------------------------------------------------------------------------|--------------------------------------------------------------------------|
| <b>Type 1: Conjugated equine estrogens (CEE) (mg)</b> |                  |                                                        |                                                                                                                       |                                                                          |
| Aloia et al.                                          | E-P <sup>a</sup> | Conjugated equine estrogens and Medroxyprogesterone    | E <sup>b</sup> : 0.625 mg<br>P <sup>c</sup> : 10 mg                                                                   | E: 0.625 mg                                                              |
| Bea et al.                                            | 1) E             | 1) Conjugated equine estrogens (Premarin)              | E: 0.625 mg/d                                                                                                         | E: 0.625 mg/d                                                            |
|                                                       | 2) E-P           | 2) Conjugated equine estrogens and Medroxyprogesterone | E: 0.625 mg/d<br>P: 2.5 mg/d                                                                                          | E: 0.625 mg/d                                                            |
| Chen et al.                                           | E-P              | Conjugated equine estrogens and Medroxyprogesterone    | E: 0.625 mg/d<br>P: 2.5 mg/d                                                                                          | E: 0.625 mg/d                                                            |
| Evans et al.                                          | E-P              | Conjugated equine estrogens and Medroxyprogesterone    | E: 0.625 mg/d<br>P: 5 mg/d                                                                                            | E: 0.625 mg/d                                                            |
| Thorneycroft et al.                                   | 1) E             | 1) Conjugated estrogens                                | a) E: 0.625 mg/d<br>b) E: 0.45 mg/d<br>c) E: 0.3 mg/d                                                                 | a) E: 0.625 mg/d<br>b) E: 0.45 mg/d<br>c) E: 0.3 mg/d                    |
|                                                       | 2) E-P           | 2) Conjugated equine estrogens and Medroxyprogesterone | a) E: 0.625 mg/d<br>P: 2.5 mg/d<br>b) E: 0.45 mg/d<br>P: 2.5 mg/d<br>c) E: 0.45 mg/d<br>P: 1.5 mg/d<br>d) E: 0.3 mg/d | a) E: 0.625 mg/d<br>b) E: 0.45 mg/d<br>c) E: 0.45 mg/d<br>d) E: 0.3 mg/d |

<sup>a</sup> Estrogen-progesterone

<sup>b</sup> Estrogen

<sup>c</sup> Progesterone

|                                                  |                        |                                                                                                       |                        |                                                                            |
|--------------------------------------------------|------------------------|-------------------------------------------------------------------------------------------------------|------------------------|----------------------------------------------------------------------------|
|                                                  |                        |                                                                                                       | P: 1.5 mg/d            |                                                                            |
| <b>Type 2: Micronized 17 beta estradiol (mg)</b> |                        |                                                                                                       |                        |                                                                            |
| Hassager & Christiansen                          | 2) E<br>(Percutaneous) | 2) 17 beta-estradiol (estrogel cream)                                                                 | E: 0.6 mg              | E: 0.375 mg<br>(1 mg 17b = 0.625 mg<br>CEE → 0.6 mg 17b =<br>0.375 mg CEE) |
| Jensen et al.                                    | 1) E                   | 1) Oral continuous estradiol (Estrofem)                                                               | E: 2 mg/d              | E: 1.25 mg/d<br>(1 mg 17b = 0.625 mg<br>CEE → 2 mg 17b = 1.25<br>mg CEE)   |
|                                                  | 2) E-P                 | 2) Sequential oral estrogen and progestogen<br>(Trisequens)                                           | E: 2 mg/d<br>P: 1 mg/d | E: 1.25 mg/d<br>(1 mg 17b = 0.625 mg<br>CEE → 2 mg 17b = 1.25<br>mg CEE)   |
| Kenny et al.                                     | E                      | 17-beta estradiol                                                                                     | E: 0.25 mg/d           | E: 0.16 mg<br>(1 mg 17b = 0.625 mg<br>CEE → 0.25 mg 17b =<br>0.16 mg CEE)  |
| Pöllänen et al.                                  | E-P                    | Combined estradiol + noretisterone acetate (synthetic<br>progesterone)                                | E: 2 mg/d<br>P: 1 mg/d | E: 1.25 mg/d<br>(1 mg 17b = 0.625 mg<br>CEE → 2 mg 17b = 1.25<br>mg CEE)   |
| Sipilä et al.                                    | E-P                    | Oestradiol and noretisterone acetate (synthetic<br>progesterone) (Kliogest)*this is 17 beta estradiol | E: 2 mg/d<br>P: 1 mg/d | E: 1.25 mg/d<br>(1 mg 17b = 0.625 mg<br>CEE → 2 mg 17b = 1.25<br>mg CEE)   |
| Sørensen et al.                                  | E-P                    | 17 beta-estradiol and cyclic norethisterone acetate<br>(Trisequens Forte)                             | E: 4 mg/d<br>P: 1 mg/d | E: 2.5 mg/d<br>(1 mg 17b = 0.625 mg<br>CEE → 4 mg 17b = 2.5<br>mg CEE)     |
| <b>Type 3: Estradiol valerate (mg)</b>           |                        |                                                                                                       |                        |                                                                            |
| Haarbo et al.                                    | 1) E-P                 | 1) Estradiol valerate + cyproterone acetate (CPA)                                                     | E: 2 mg/d<br>P: 1 mg/d | E: 0.625 mg/d                                                              |
|                                                  | 2) E-P                 | 2) Estradiol valerate + levonorgestrel (LNG)                                                          | E: 2 mg/d              | E: 0.625 mg/d                                                              |

|                                      |               |                                                                                   |                                         |                                                                     |
|--------------------------------------|---------------|-----------------------------------------------------------------------------------|-----------------------------------------|---------------------------------------------------------------------|
|                                      |               |                                                                                   | P: 75 µg/d                              |                                                                     |
| Hassager & Christiansen              | 1) E-P (Oral) | 1) Estradiol valerate + cyproterone acetate                                       | E: 2 mg/d<br>P: 1 mg                    | E: 0.625 mg/d                                                       |
| <b>Type 4: Transdermal estradiol</b> |               |                                                                                   |                                         |                                                                     |
| Blackman et al.                      | E-P           | Estradiol transdermal patches (Estraderm) + medroxyprogesterone acetate (Provera) | E: 100 µg/d<br>à (0.1 mg)<br>P: 10 mg/d | E: 1.25 mg/d<br>(0.05 mg = 0.625 mg CEE)<br>à 0.1 mg = 1.25 mg CEE) |

#### References

1. Gambacciani M, Genazzani AR. Hormone replacement therapy: The benefits in tailoring the regimen and dose. *Maturitas*. 2001;40(3):195-201. doi:10.1016/S0378-5122(01)00281-X
2. Lindsay R, Hart DM, Clark DM. The minimum effective dose of estrogen for prevention of postmenopausal bone loss. *Obstet Gynecol*. 1984;63(6):759-763.
3. Panay N, Ylikorkala O, Archer DF, Gut R, Lang E. Ultra-low-dose estradiol and norethisterone acetate: Effective menopausal symptom relief. *Climacteric*. 2007;10(2):120-131. doi:10.1080/13697130701298107
4. Archer DF. Estrace® vs Premarin® for treatment of menopausal symptoms: Dosage comparison study. *Adv Ther*. 1992;9:21-31.
5. Anderson PO, Knoben JE, Troutman WG. *Handbook of Clinical Drug Data*.; 2002. doi:10.7326/0003-4819-110-11-948\_2
6. Kenigsberg L, Balachandar S, Prasad K, Shah B. Exogenous Pubertal Induction by Oral versus Transdermal Estrogen Therapy. *J Pediatr Adolesc Gynecol*. 2013;26(2):71-79. doi:10.1016/j.jpag.2011.09.012

**eTable 3. Study Characteristics (Part 1)**

| Reference               | Publication Date | Study Date | Country | Total recruited participants      | Total participants included in analysis                       | Age (years)     | Ethnicity                                                                                                                             |
|-------------------------|------------------|------------|---------|-----------------------------------|---------------------------------------------------------------|-----------------|---------------------------------------------------------------------------------------------------------------------------------------|
| Aloia et al.            | 1995             | N/A        | USA     | 118                               | 77                                                            | 52.162 ± 0.654  | Caucasian                                                                                                                             |
| Bea et al.              | 2001             | 1993-2004  | USA     | 1) 927                            | 1) 927                                                        | 1) 63.35 ± 7.6  | N/A                                                                                                                                   |
|                         |                  |            |         | 2) 1014                           | 2) 1014                                                       | 2) 63.29 ± 7.2  |                                                                                                                                       |
| Blackman et al.         | 2002             | 1992-1998  | USA     | 28                                | 28                                                            | 71.5 ± 1.12     | N/A                                                                                                                                   |
| Chen et al.             | 2005             | 1993-2001  | USA     | 835                               | 835                                                           | 63.1 ± 7.2      | Caucasian 82.4%<br>Black 10.4%<br>Hispanic 5.3%<br>American Indian 1.07%<br>Asian or Pacific Islander 0.35%<br>Other or unknown 0.48% |
|                         |                  |            |         |                                   | <i>Sensitivity analysis:</i> 511 (256 placebo, 255 treatment) |                 |                                                                                                                                       |
| Evans et al.            | 2001             | N/A        | USA     | 68                                | 68 (But only 34 in HT and placebo groups)                     | 67.7 ± 5.2      | N/A                                                                                                                                   |
| Haarbo et al.           | 1991             | N/A        | Denmark | 75                                | 1) 43 (19 treatment, 24 placebo)                              | 45-55 years     | N/A                                                                                                                                   |
|                         |                  |            |         |                                   | 2) 43 (19 treatment, 24 placebo)                              |                 |                                                                                                                                       |
| Hassager & Christiansen | 1989             | 1983-1985  | Denmark | 133                               | 1) 65 (32 treatment, 33 control)                              | 1) 49.91 ± 2.36 | N/A                                                                                                                                   |
|                         |                  |            |         |                                   | 2) 45 (20 treatment, 25 control)                              | 2) 50.41 ± 2.29 |                                                                                                                                       |
| Jensen et al.           | 2003             | 1990-1993  | Denmark | 1006 (502 treatment, 504 placebo) | 621 (268 treatment, 353 placebo)                              | 50.1 ± 2.8      | N/A                                                                                                                                   |
| Kenny et al.            | 2005             | N/A        | USA     | 167                               | 107 (At follow up 58 - treatment, 49 - placebo)               | 74.3 ± 0.6      | N/A                                                                                                                                   |
| Pöllänen et al.         | 2007             | N/A        | Finland | 20                                | 15                                                            | 53.6 ± 1.85     | N/A                                                                                                                                   |
| Sipilä et al.           | 2001             | N/A        | Finland | 80                                | 52 (But only 30 in HT and placebo groups)                     | 50-55           | N/A                                                                                                                                   |
| Sørensen et al.         | 2001             | N/A        | Denmark | 16                                | 14                                                            | 55.5 ± 2.6      | N/A                                                                                                                                   |
| Thorneycroft et al.     | 2007             | N/A        | USA     | 822                               | 502                                                           | 51.6 ± 3.7      | Caucasian 90%<br>Other 10%                                                                                                            |

**eTable 4. Study Characteristics (Part 2)**

| Reference (continued)         | Type of Menopause                                   | Mean time since menopause + SE                            | HT                  |                                            |                                                                                           |
|-------------------------------|-----------------------------------------------------|-----------------------------------------------------------|---------------------|--------------------------------------------|-------------------------------------------------------------------------------------------|
| Aloia et al.                  | Natural                                             | 2.27±0.33 years                                           | E-P                 | E: 0.625 mg<br>P: 10 mg                    | E: 25 days out of a month<br>P: 9 days (days 16 - 25)                                     |
| Bea et al.                    | Both (Baseline - 47.7% were induced, 52.2% natural) | 1) 22.21 ± 8.4 years                                      | 1) E                | 0.625 mg/d                                 | 7.7±1.8 years                                                                             |
|                               |                                                     | 2) 13.53 ± 8.5 years                                      | 2) E-P              | E: 0.625 mg/d<br>P: 2.5 mg/d               | 6.3±1.5 years                                                                             |
| Blackman et al.               | N/A                                                 | N/A                                                       | E-P                 | E: 100 µg/d for 6 months<br>P: 10 mg/d for | E: 6 months<br>P: Last 10 days of each 28-day cycle for 6 months (~60-65 days)            |
| Chen et al.                   | Natural                                             | 13.8 ± 8.9 years                                          | E-P                 | E: 0.625 mg/d<br>P: 2.5 mg/d               | 3 years                                                                                   |
| Evans et al.                  | N/A                                                 | Mean age at menopause: 49 ± 5, Current mean age: 67.8 ± 5 | E-P                 | E: 0.625 mg/d<br>P: 5 mg/d                 | 13 days every 3rd month                                                                   |
| Haarbo et al.                 | Natural                                             | 20.08 ± 8.97 months                                       | 1) E-P              | E: 2 mg/d<br>P: 1 mg/d                     | 2 years                                                                                   |
|                               |                                                     |                                                           | 2) E-P              | E: 2 mg/d<br>P: 75 µg/d                    | 2 years                                                                                   |
| Hassager & Christiansen       | Natural                                             | Inclusion criteria: menopause within the last 0.5-3 years | 1) E-P (Oral)       | E: 2 mg/d<br>P: 1 mg                       | In a 28-day cycle: E: days 1-11<br>E-P: days 12-21<br>None: days 22-28                    |
|                               |                                                     |                                                           | 2) E (Percutaneous) | E: 0.6 mg                                  | In a 28-day cycle, E: days 1-24, 5 g<br>None: days 25-28                                  |
| Jensen et al.                 | Both (Baseline - 41% were induced, 59% natural)     | 0.7 ± 0.6 years                                           | 1) E                | 2 mg/d                                     | 5 years                                                                                   |
|                               |                                                     |                                                           | 2) E-P              | E: 2 mg<br>P: 1 mg                         | In a 28 day cycle:<br>E: days 1-12<br>E-P: days 13-22 E: days 23-28                       |
| Kenny et al.                  | N/A                                                 | Mean age: 74.3 ± 0.6 (older postmenopausal)               | E                   | 0.25 mg/d (ultra-low dose)                 | 36 months                                                                                 |
| Pöllänen et al.               | N/A                                                 | 2.8 ± 3.6 years                                           | E-P                 | E: 2 mg/d<br>P: 1 mg/d                     | 1 year                                                                                    |
| Sipilä et al.                 | N/A                                                 | Inclusion criteria: menopause within the last 5 years     | E-P                 | E: 2 mg/d<br>P: 1 mg/d                     | 1 year                                                                                    |
| Sørensen et al.               | Natural                                             | 5.9 ± 3.9 years                                           | E-P                 | E: 4 mg<br>P: 1 mg                         | In a 28 day cycle:<br>E: 4 mg for 22 days and 1 mg for 6 days, P: 10 days. Total 12 weeks |
| Thorneycroft et al.           | Natural                                             | 2.3 ± 0.9 years                                           | 1) E                | a) E: 0.625 mg/d                           | 2 years                                                                                   |
|                               |                                                     |                                                           |                     | b) E: 0.45 mg/d                            | 2 years                                                                                   |
|                               |                                                     |                                                           |                     | c) E: 0.3 mg/d                             | 2 years                                                                                   |
|                               |                                                     |                                                           | 2) E-P              | a) E: 0.625 mg/d<br>P: 2.5 mg/d            | 2 years                                                                                   |
|                               |                                                     |                                                           |                     | b) E: 0.45 mg/d<br>P: 2.5 mg/d             | 2 years                                                                                   |
|                               |                                                     |                                                           |                     | c) E: 0.45 mg/d<br>P: 1.5 mg/d             | 2 years                                                                                   |
| d) E: 0.3 mg/d<br>P: 1.5 mg/d | 2 years                                             |                                                           |                     |                                            |                                                                                           |



**eTable 5. Study Characteristics (Part 3)**

| Reference<br>(continued) | HT (continued)                                                                    |                            | Comparison<br>Groups   | Follow-up period |
|--------------------------|-----------------------------------------------------------------------------------|----------------------------|------------------------|------------------|
|                          | Name                                                                              | Cyclical or<br>Continuous? | Placebo or<br>Control? |                  |
| Aloia et al.             | Conjugated equine estrogens and Medroxyprogesterone                               | Continuous                 | Placebo                | 2.9 ± 1.1 years  |
| Bea et al.               | 1) Conjugated equine estrogens (Premarin)                                         | Continuous                 | Placebo                | 6 years          |
|                          | 2) Conjugated equine estrogens and Medroxyprogesterone                            | Continuous                 |                        |                  |
| Blackman et al.          | Estradiol transdermal patches (Estraderm) + medroxyprogesterone acetate (Provera) | Continuous                 | Placebo                | 6 months         |
| Chen et al.              | Conjugated equine estrogens and Medroxyprogesterone                               | Continuous                 | Placebo                | 3 years          |
| Evans et al.             | Conjugated equine estrogens and Medroxyprogesterone                               | Cyclical                   | Control                | N/A              |
| Haarbo et al.            | 1) Estradiol valerate + cyproterone acetate (CPA)                                 | Continuous                 | Placebo                | 2 years          |
|                          | 2) Estradiol valerate + levonorgestrel (LNG)                                      | Continuous                 |                        |                  |
| Hassager & Christiansen  | 1) Estradiol valerate + cyproterone acetate                                       | Cyclical                   | Control                | 2 years          |
|                          | 2) 17 beta-estradiol (estrogel cream)                                             | Continuous                 |                        |                  |
| Jensen et al.            | 1) Oral continuous estradiol (Estrofem)                                           | Continuous                 | Control                | 5 years          |
|                          | 2) Sequential oral estrogen and progestogen (Trisequens)                          | Cyclical                   |                        |                  |
| Kenny et al.             | 17-beta estradiol                                                                 | Continuous                 | Placebo                | 3 years          |
| Pöllänen et al.          | Combined estradiol + noretisterone acetate (synthetic progesterone)               | Continuous                 | Placebo                | 12 months        |
| Sipilä et al.            | Oestradiol and noretisterone acetate (synthetic progesterone) (Kliogest)          | Continuous                 | Placebo                | 12 months        |
| Sørensen et al.          | 17 beta-estradiol and cyclic norethisterone acetate (Trisequens Forte)            | Cyclical                   | Placebo                | N/A              |
| Thornycroft et al.       | 1) Conjugated estrogens                                                           | a) Continuous              | Placebo                | 2 years          |
|                          |                                                                                   | b) Continuous              |                        |                  |
|                          |                                                                                   | c) Continuous              |                        |                  |
|                          | 2) Conjugated equine estrogens and Medroxyprogesterone                            | a) Continuous              |                        |                  |
|                          |                                                                                   | b) Continuous              |                        |                  |
|                          |                                                                                   | c) Continuous              |                        |                  |
|                          | d) Continuous                                                                     |                            |                        |                  |

**eTable 6. Risk of Bias Assessment**

|                         | <b>Selection bias:</b><br>Random sequence generation | <b>Selection bias:</b><br>Allocation concealment | <b>Performance bias:</b> Blinding of participants and personnel | <b>Detection bias:</b> Blinding of outcome assessment | <b>Attrition bias:</b> Incomplete outcome data | <b>Reporting bias:</b> Selective Reporting | <b>Other bias:</b> Other sources of bias | <b>Overall Risk of Bias?</b> |
|-------------------------|------------------------------------------------------|--------------------------------------------------|-----------------------------------------------------------------|-------------------------------------------------------|------------------------------------------------|--------------------------------------------|------------------------------------------|------------------------------|
| Aloia et al.            | Low                                                  | Unclear <sup>1</sup>                             | Unclear <sup>1</sup>                                            | Low <sup>2</sup>                                      | High <sup>3</sup>                              | High <sup>4</sup>                          | High <sup>5</sup>                        | <b>High</b>                  |
| Bea et al.              | Low                                                  | Unclear                                          | Low                                                             | Low                                                   | Low                                            | Low                                        | Low                                      | <b>Unclear</b>               |
| Blackman et al.         | Low                                                  | Unclear <sup>1</sup>                             | Low                                                             | Low                                                   | Low                                            | Low                                        | High                                     | <b>Unclear<sup>6</sup></b>   |
| Evans et al.            | High                                                 | Unclear                                          | Unclear                                                         | Unclear                                               | Low                                            | Low                                        | Low                                      | <b>High</b>                  |
| Haarbo et al.           | Low                                                  | Unclear                                          | Unclear                                                         | Unclear                                               | High                                           | Low                                        | High <sup>7</sup>                        | <b>High</b>                  |
| Hassager & Christiansen | Low                                                  | Unclear                                          | Low <sup>8</sup>                                                | Low                                                   | Low <sup>9</sup>                               | High <sup>10</sup>                         | Low                                      | <b>Unclear<sup>6</sup></b>   |
| Jensen et al.           | Low <sup>11</sup>                                    | Low                                              | High                                                            | High                                                  | Low <sup>12</sup>                              | Low                                        | Low                                      | <b>High</b>                  |
| Kenny et al.            | Low                                                  | Unclear                                          | Low                                                             | Low                                                   | Low                                            | High <sup>13</sup>                         | High <sup>14</sup>                       | <b>High</b>                  |
| Pöllänen et al.         | Low                                                  | Unclear                                          | Low                                                             | Low                                                   | High <sup>15</sup>                             | Low                                        | High <sup>16</sup>                       | <b>High<sup>7</sup></b>      |
| Sipilä et al.           | Low                                                  | Low                                              | Low                                                             | Low                                                   | Low                                            | Low                                        | Low                                      | <b>Low</b>                   |
| Sørensen et al.         | Low                                                  | Low                                              | Low                                                             | Low                                                   | Low                                            | Low                                        | High <sup>18</sup>                       | <b>Unclear</b>               |
| Thornycroft et al.      | Low                                                  | Unclear                                          | Low                                                             | Low                                                   | Low <sup>19</sup>                              | Low                                        | Low                                      | <b>Low</b>                   |

<sup>1</sup> No information. This was never stated implicitly or explicitly.

<sup>2</sup> If it is double blind, we can assume that this is low risk.

<sup>3</sup> Study did not explain which groups the women dropped out of, although they gave reasons.

<sup>4</sup> The ‘per year’ analysis warranted a “high” assessment.

<sup>5</sup> Control group received vitamin D, and there are potentially unbalanced baseline groups.

<sup>6</sup> The “unclear” category is unlikely to bias the outcome.

<sup>7</sup> Menopausal age was very different in the placebo group.

<sup>8</sup> One treatment arm affected by unblinding, but it is reasonable.

<sup>9</sup> Percutaneous group has higher rates of dropout due to side effects, but they did report the outcomes.

<sup>10</sup> Combined placebo groups and didn’t explain why, nor quantify the similarity.

<sup>11</sup> Only partial randomization, but we only considered the randomized groups.

<sup>12</sup> Didn’t give reasons for dropout, but the numbers are balanced. Used intention to treat analysis.

<sup>13</sup> No results of mixed model reported, although they mentioned it.

<sup>14</sup> Progesterone was given to placebo women as well.

<sup>15</sup> Did not address reasons for dropout, which is quite different between groups.

<sup>16</sup> Very small study.

<sup>17</sup> This study was not designed for our purposes.

<sup>18</sup> Very short follow-up.

<sup>19</sup> Small percentage of dropout.

**eTable 7.** Summary Meta-analysis of the Association Between Less Than 0.625 mg Estrogen-Only Treatment and Muscle Mass Outcomes

**Impact of Low Dose Estrogen on Lean Body Mass by Study**

| Study Name              | Experimental                                                |            | Control   |            | Mean Difference | 95% CI             |
|-------------------------|-------------------------------------------------------------|------------|-----------|------------|-----------------|--------------------|
|                         | Mean + SD                                                   | Total      | Mean + SD | Total      |                 |                    |
| Hassager, 1989          | 2) 0.81±1.65                                                | 20         | 0.33±2.13 | 58         | 0.48            | -0.43, 1.39        |
| Kenny, 2005             | -0.3±3.37                                                   | 71         | -0.5±3.3  | 68         | 0.20            | -0.91, 1.31        |
| Thorneycroft, 2007      | 1b) 0.26±1.56                                               | 95         | 0.19±1.55 | 94         | 0.07            | -0.37, 0.51        |
|                         | 1c) -0.04±1.51                                              | 89         | 0.19±1.55 | 94         | -0.23           | -0.67, 0.21        |
| <b>Total</b>            |                                                             | <b>275</b> |           | <b>314</b> | <b>-0.01</b>    | <b>-0.29, 0.28</b> |
| Heterogeneity           | Chi <sup>2</sup> = 2.33, df =3 (P=0.51); I <sup>2</sup> =0% |            |           |            |                 |                    |
| Test for overall effect | Z=0.04 (P=0.97)                                             |            |           |            |                 |                    |

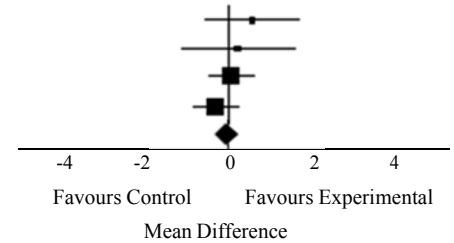

*Caption:* The forest plot of the meta-analyses of treatment arms utilizing less than 0.625 mg estrogen-only treatment, which presents the mean differences and 95% confidence intervals for lean body mass between women taking hormone replacement therapy and women who were not taking hormone replacement therapy (control group).

**eTable 8.** Summary Meta-analysis of the Association Between 0.625 mg or More Estrogen-Only Treatment and Muscle Mass Outcomes

**Impact of High Dose Estrogen on Lean Body Mass by Study**

| Study Name              | Experimental                                                 |            | Control   |            | Mean Difference | 95% CI             |
|-------------------------|--------------------------------------------------------------|------------|-----------|------------|-----------------|--------------------|
|                         | Mean + SD                                                    | Total      | Mean + SD | Total      |                 |                    |
| Thorneycroft, 2007      | 1a) -0.12±1.87                                               | 97         | 0.19±1.55 | 94         | -0.31           | -0.80, 0.18        |
| Bea, 2001               | 1) -0.44±2.28                                                | 453        | -0.5±2.45 | 474        | 0.06            | -0.24, 0.36        |
| <b>Total</b>            |                                                              | <b>550</b> |           | <b>568</b> | <b>-0.04</b>    | <b>-0.30, 0.21</b> |
| Heterogeneity           | Chi <sup>2</sup> = 1.60, df =1 (P=0.21); I <sup>2</sup> =37% |            |           |            |                 |                    |
| Test for overall effect | Z=0.34 (P=0.74)                                              |            |           |            |                 |                    |

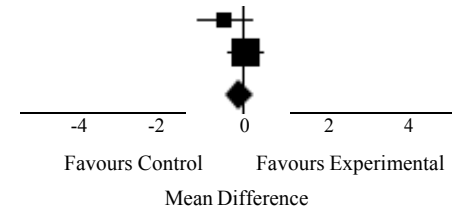

*Caption:* The forest plot of the meta-analyses of treatment arms utilizing 0.625 mg or more estrogen-only treatment, which presents the mean differences and 95% confidence intervals for lean body mass between women taking hormone replacement therapy and women who were not taking hormone replacement therapy (control group).

**eTable 9.** Summary Meta-analysis of the Association Between Less than 0.625 mg Estrogen + Any Dose Progesterone Treatment and Muscle Mass Outcomes

**Impact of Low Dose Estrogen-Progesterone on Lean Body Mass by Study**

| Study Name              | Experimental                                                |            | Control   |            | Mean Difference | 95% CI             |
|-------------------------|-------------------------------------------------------------|------------|-----------|------------|-----------------|--------------------|
|                         | Mean + SD                                                   | Total      | Mean + SD | Total      |                 |                    |
| Thorneycroft, 2007      | 2b) 0.1±1.47                                                | 96         | 0.19±1.55 | 94         | -0.09           | -0.52, 0.34        |
|                         | 2c) 0.13±1.45                                               | 94         | 0.19±1.55 | 94         | -0.06           | -0.49, 0.37        |
|                         | 2d) 0.16±1.39                                               | 98         | 0.19±1.55 | 94         | -0.03           | -0.45, 0.39        |
| <b>Total</b>            |                                                             | <b>288</b> |           | <b>282</b> | <b>-0.06</b>    | <b>-0.30, 0.19</b> |
| Heterogeneity           | Chi <sup>2</sup> = 0.04, df =2 (P=0.98); I <sup>2</sup> =0% |            |           |            |                 |                    |
| Test for overall effect | Z=0.47 (P=0.64)                                             |            |           |            |                 |                    |

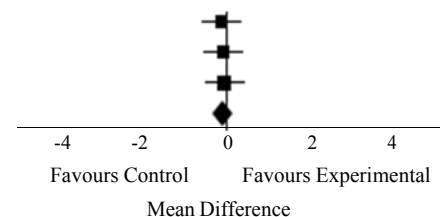

*Caption:* The forest plot of the meta-analyses of treatment arms utilizing less than 0.625 mg estrogen + any dose progesterone treatment, which presents the mean differences and 95% confidence intervals for lean body mass between women taking hormone replacement therapy and women who were not taking hormone replacement therapy (control group).

**eTable 10.** Summary Meta-analysis of the Association Between 0.625 mg or More Estrogen + Any Dose Progesterone Treatment and Muscle Mass Outcomes

**Impact of High Dose Estrogen-Progesterone on Lean Body Mass by Study**

| Study Name              | Experimental                                                 |            | Control    |            | Mean Difference | 95% CI             |
|-------------------------|--------------------------------------------------------------|------------|------------|------------|-----------------|--------------------|
|                         | Mean + SD                                                    | Total      | Mean + SD  | Total      |                 |                    |
| Hassager, 1989          | 1) 0.19±2.15                                                 | 32         | 0.33±2.13  | 58         | -0.14           | -1.06, 0.78        |
| Haarbo, 1991            | 1) -0.2±5.2                                                  | 19         | -0.7±3.85  | 24         | 0.5             | -2.30, 3.30        |
|                         | 2) 0.6±3.7                                                   | 19         | -0.7±3.85  | 24         | 1.30            | -1.00, 3.60        |
| Aloia, 1995             | -1.06±1.64                                                   | 30         | -0.75±1.59 | 28         | -0.31           | -1.14, 0.52        |
| Evans, 2001             | 1.1±1.9                                                      | 15         | 0.5±1.4    | 19         | 0.60            | -0.55, 1.75        |
| Sipilä, 2001            | 1.1±4.25                                                     | 15         | -0.3±4.65  | 15         | 1.40            | -1.79, 4.59        |
| Sørensen, 2001          | 0.35±0.86                                                    | 7          | -1.0±1.58  | 7          | 1.34            | 0.01, 2.67         |
| Blackman, 2002          | 1.2±4.58                                                     | 19         | 0.4±3.93   | 14         | 0.8             | -2.11, 3.71        |
| Pöllänen, 2007          | 1.00±4.00                                                    | 10         | -1.4±3.10  | 5          | 2.40            | -1.28, 6.08        |
| Thornycroft, 2007       | 2a) 0.55±1.48                                                | 86         | 0.19±1.55  | 94         | 0.36            | -0.08, 0.80        |
| Bea, 2001               | 2) -0.29±1.99                                                | 543        | -0.4±2.15  | 471        | 0.11            | -0.15, 0.37        |
| <b>Total</b>            |                                                              | <b>795</b> |            | <b>759</b> | <b>0.19</b>     | <b>-0.01, 0.39</b> |
| Heterogeneity           | Chi <sup>2</sup> = 9.23, df =10 (P=0.51); I <sup>2</sup> =0% |            |            |            |                 |                    |
| Test for overall effect | Z=1.90 (P=0.06)                                              |            |            |            |                 |                    |

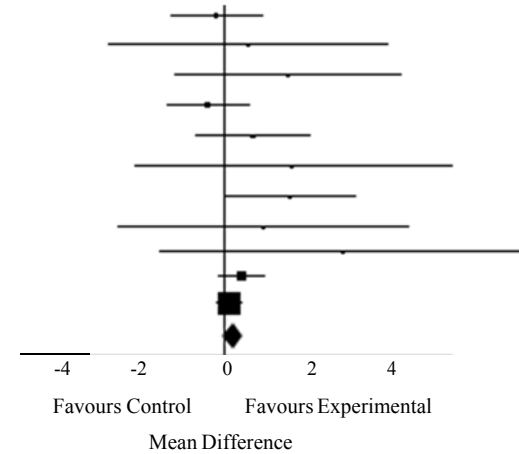

*Caption:* The forest plot of the meta-analyses of treatment arms utilizing 0.625 mg or more estrogen + any dose progesterone treatment, which presents the mean differences and 95% confidence intervals for lean body mass between women taking hormone replacement therapy and women who were not taking hormone replacement therapy (control group).

**eTable 11.** Summary Meta-analysis of the Association Between Shorter Follow-up Lengths and Muscle Mass Outcomes

**Impact of Shorter Follow-Ups on Lean Body Mass by Study**

| Study Name              | Experimental                                                 |       | Control    |       | Mean Difference | 95% CI      |
|-------------------------|--------------------------------------------------------------|-------|------------|-------|-----------------|-------------|
|                         | Mean + SD                                                    | Total | Mean + SD  | Total |                 |             |
| Hassager, 1989          | 1) 0.19±2.15                                                 | 32    | 0.33±2.13  | 58    | -0.14           | -1.06, 0.78 |
|                         | 2) 0.81±1.65                                                 | 20    | 0.33±2.13  | 58    | 0.48            | -0.43, 1.39 |
| Haarbo, 1991            | 1) -0.2±5.2                                                  | 19    | -0.7±3.85  | 24    | 0.5             | -2.30, 3.30 |
|                         | 2) 0.6±3.7                                                   | 19    | -0.7±3.85  | 24    | 1.30            | -1.00, 3.60 |
| Sipilä, 2001            | 1.1±4.25                                                     | 15    | -0.3±4.65  | 15    | 1.40            | -1.79, 4.59 |
| Blackman, 2002          | 1.2±4.58                                                     | 19    | 0.4±3.93   | 14    | 0.8             | -2.11, 3.71 |
| Pöllänen, 2007          | 1.00±4.00                                                    | 10    | -1.4±3.10  | 5     | 2.40            | -1.28, 6.08 |
| Thornycroft, 2007       | 1a) -0.12±1.87                                               | 97    | 0.19±1.55  | 94    | -0.31           | -0.80, 0.18 |
|                         | 1b) 0.26±1.56                                                | 95    | 0.19±1.55  | 94    | 0.07            | -0.37, 0.51 |
|                         | 1c) -0.04±1.51                                               | 89    | 0.19±1.55  | 94    | -0.23           | -0.67, 0.21 |
|                         | 2a) 0.55±1.48                                                | 86    | 0.19±1.55  | 94    | 0.36            | -0.08, 0.80 |
|                         | 2b) 0.1±1.47                                                 | 96    | 0.19±1.55  | 94    | -0.09           | -0.52, 0.34 |
|                         | 2c) 0.13±1.45                                                | 94    | 0.19±1.55  | 94    | -0.06           | -0.49, 0.37 |
|                         | 2d) 0.16±1.39                                                | 98    | 0.19±1.55  | 94    | -0.03           | -0.45, 0.39 |
|                         | <b>Total</b>                                                 |       | <b>789</b> |       | <b>856</b>      | <b>0.00</b> |
| Heterogeneity           | Chi <sup>2</sup> = 10.67, df=13 (P=0.64); I <sup>2</sup> =0% |       |            |       |                 |             |
| Test for overall effect | Z=0.04 (P=0.97)                                              |       |            |       |                 |             |

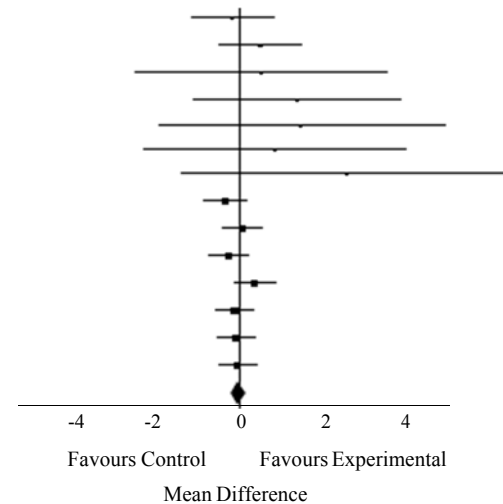

*Caption:* The forest plot of the meta-analyses of studies with shorter follow-up lengths, which presents the mean differences and 95% confidence intervals for lean body mass between women taking hormone replacement therapy and women who were not taking hormone replacement therapy (control group).

**eTable 12.** Summary Meta-analysis of the Association Between Longer Follow-up Lengths and Muscle Mass Outcomes

**Impact of Longer Follow-Ups on Lean Body Mass by Study**

| Study Name              | Experimental                                                |             | Control    |             | Mean Difference | 95% CI             |
|-------------------------|-------------------------------------------------------------|-------------|------------|-------------|-----------------|--------------------|
|                         | Mean + SD                                                   | Total       | Mean + SD  | Total       |                 |                    |
| Aloia, 1995             | -1.06±1.64                                                  | 30          | -0.75±1.59 | 28          | -0.31           | -1.14, 0.52        |
| Jensen, 2003            | 0.18±1.77                                                   | 268         | -0.02±2.33 | 353         | 0.20            | -0.12, 0.52        |
| Kenny, 2005             | -0.3±3.37                                                   | 71          | -0.5±3.3   | 68          | 0.20            | -0.91, 1.31        |
| Bea, 2001               | 1) -0.44±2.28                                               | 453         | -0.5±2.45  | 474         | 0.06            | -0.24, 0.36        |
|                         | 2) -0.29±1.99                                               | 543         | -0.4±2.15  | 471         | 0.11            | -0.15, 0.37        |
| <b>Total</b>            |                                                             | <b>1365</b> |            | <b>1394</b> | <b>0.10</b>     | <b>-0.06, 0.27</b> |
| Heterogeneity           | Chi <sup>2</sup> = 1.40, df =4 (P=0.84); I <sup>2</sup> =0% |             |            |             |                 |                    |
| Test for overall effect | Z=1.26 (P=0.21)                                             |             |            |             |                 |                    |

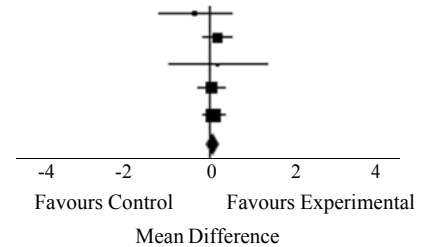

*Caption:* The forest plot of the meta-analyses of studies with longer follow-up lengths, which presents the mean differences and 95% confidence intervals for lean body mass between women taking hormone replacement therapy and women who were not taking hormone replacement therapy (control group).



**eTable 13.** Summary Meta-analysis of Studies With <10 Years of Time Since Menopause

**Impact of Younger Menopausal Age on Lean Body Mass by Study**

| Study Name              | Experimental                                                   |             | Control    |             | Mean Difference | 95% CI             |
|-------------------------|----------------------------------------------------------------|-------------|------------|-------------|-----------------|--------------------|
|                         | Mean + SD                                                      | Total       | Mean + SD  | Total       |                 |                    |
| Hassager, 1989          | 1) 0.19±2.15                                                   | 32          | 0.33±2.13  | 58          | -0.14           | -1.06, 0.78        |
|                         | 2) 0.81±1.65                                                   | 20          | 0.33±2.13  | 58          | 0.48            | -0.43, 1.39        |
| Haarbo, 1991            | 1) -0.2±5.2                                                    | 19          | -0.7±3.85  | 24          | 0.5             | -2.30, 3.30        |
|                         | 2) 0.6±3.7                                                     | 19          | -0.7±3.85  | 24          | 1.30            | -1.00, 3.60        |
| Aloia, 1995             | -1.06±1.64                                                     | 30          | -0.75±1.59 | 28          | -0.31           | -1.14, 0.52        |
| Sipilä, 2001            | 1.1±4.25                                                       | 15          | -0.3±4.65  | 15          | 1.40            | -1.79, 4.59        |
| Sørensen, 2001          | 0.35±0.86                                                      | 7           | -1.0±1.58  | 7           | 1.34            | 0.01, 2.67         |
| Jensen, 2003            | 0.18±1.77                                                      | 268         | -0.02±2.33 | 353         | 0.20            | -0.12, 0.52        |
| Pöllänen, 2007          | 1.00±4.00                                                      | 10          | -1.4±3.10  | 5           | 2.40            | -1.28, 6.08        |
| Thornycroft, 2007       | 1a) -0.12±1.87                                                 | 97          | 0.19±1.55  | 94          | -0.31           | -0.80, 0.18        |
|                         | 1b) 0.26±1.56                                                  | 95          | 0.19±1.55  | 94          | 0.07            | -0.37, 0.51        |
|                         | 1c) -0.04±1.51                                                 | 89          | 0.19±1.55  | 94          | -0.23           | -0.67, 0.21        |
|                         | 2a) 0.55±1.48                                                  | 86          | 0.19±1.55  | 94          | 0.36            | -0.08, 0.80        |
|                         | 2b) 0.1±1.47                                                   | 96          | 0.19±1.55  | 94          | -0.09           | -0.52, 0.34        |
|                         | 2c) 0.13±1.45                                                  | 94          | 0.19±1.55  | 94          | -0.06           | -0.49, 0.37        |
|                         | 2d) 0.16±1.39                                                  | 98          | 0.19±1.55  | 94          | -0.03           | -0.45, 0.39        |
| <b>Total</b>            |                                                                | <b>1075</b> |            | <b>1230</b> | <b>0.04</b>     | <b>-0.10, 0.18</b> |
| Heterogeneity           | Chi <sup>2</sup> = 15.99, df = 15 (P=0.38); I <sup>2</sup> =6% |             |            |             |                 |                    |
| Test for overall effect | Z= 0.55 (P=0.58)                                               |             |            |             |                 |                    |

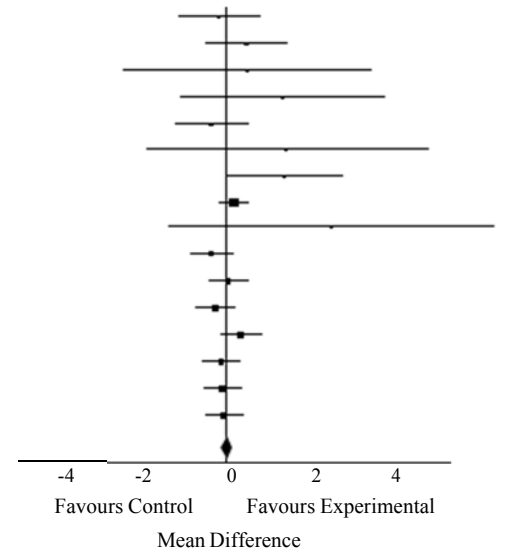

*Caption:* The forest plot of the meta-analyses of studies with participants who had <10 years of time since menopause, presenting the mean differences and 95% confidence intervals for lean body mass between women taking hormone replacement therapy and women who were not taking hormone replacement therapy (control group).

**eTable 14.** Summary Meta-analysis of the Association Between Shorter Times Since Menopause and Muscle Mass Outcomes

**Impact of Shorter Time Since Menopause on Lean Body Mass by Study**

| Study Name              | Experimental                                                  |             | Control    |             | Mean Difference | 95% CI             |
|-------------------------|---------------------------------------------------------------|-------------|------------|-------------|-----------------|--------------------|
|                         | Mean + SD                                                     | Total       | Mean + SD  | Total       |                 |                    |
| Haarbo, 1991            | 1) -0.2±5.2                                                   | 19          | -0.7±3.85  | 24          | 0.5             | -2.30, 3.30        |
|                         | 2) 0.6±3.7                                                    | 19          | -0.7±3.85  | 24          | 1.30            | -1.00, 3.60        |
| Aloia, 1995             | -1.06±1.64                                                    | 30          | -0.75±1.59 | 28          | -0.31           | -1.14, 0.52        |
| Jensen, 2003            | 0.18±1.77                                                     | 268         | -0.02±2.33 | 353         | 0.20            | -0.12, 0.52        |
| Pöllänen, 2007          | 1.00±4.00                                                     | 10          | -1.4±3.10  | 5           | 2.40            | -1.28, 6.08        |
| Thorneycroft, 2007      | 1a) -0.12±1.87                                                | 97          | 0.19±1.55  | 94          | -0.31           | -0.80, 0.18        |
|                         | 1b) 0.26±1.56                                                 | 95          | 0.19±1.55  | 94          | 0.07            | -0.37, 0.51        |
|                         | 1c) -0.04±1.51                                                | 89          | 0.19±1.55  | 94          | -0.23           | -0.67, 0.21        |
|                         | 2a) 0.55±1.48                                                 | 86          | 0.19±1.55  | 94          | 0.36            | -0.08, 0.80        |
|                         | 2b) 0.1±1.47                                                  | 96          | 0.19±1.55  | 94          | -0.09           | -0.52, 0.34        |
|                         | 2c) 0.13±1.45                                                 | 94          | 0.19±1.55  | 94          | -0.06           | -0.49, 0.37        |
|                         | 2d) 0.16±1.39                                                 | 98          | 0.19±1.55  | 94          | -0.03           | -0.45, 0.39        |
| <b>Total</b>            |                                                               | <b>1001</b> |            | <b>1092</b> | <b>0.01</b>     | <b>-0.13, 0.16</b> |
| Heterogeneity           | Chi <sup>2</sup> = 10.45, df =11 (P=0.49); I <sup>2</sup> =0% |             |            |             |                 |                    |
| Test for overall effect | Z=0.20 (P=0.84)                                               |             |            |             |                 |                    |

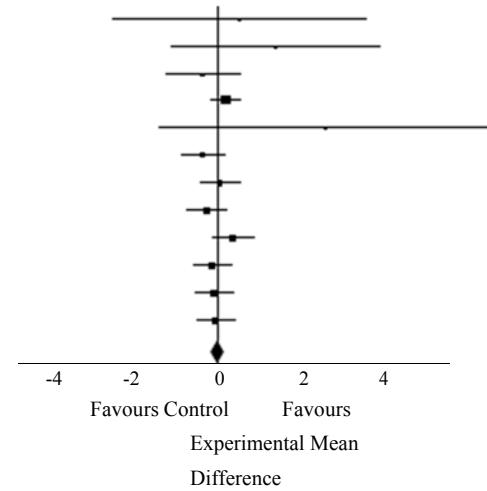

*Caption:* The forest plot of the meta-analyses of studies with shorter times since menopause, which presents the mean differences and 95% confidence intervals for lean body mass between women taking hormone replacement therapy and women who were not taking hormone replacement therapy (control group).

**eTable 15.** Summary Meta-analysis of the Association Between Longer Times Since Menopause and Muscle Mass Outcomes

**Impact of Longer Time Since Menopause on Lean Body Mass by Study**

| Study Name              | Experimental                                                 |             | Control   |            | Mean Difference | 95% CI             |
|-------------------------|--------------------------------------------------------------|-------------|-----------|------------|-----------------|--------------------|
|                         | Mean + SD                                                    | Total       | Mean + SD | Total      |                 |                    |
| Evans, 2001             | 1.1±1.9                                                      | 15          | 0.5±1.4   | 19         | 0.60            | -0.55, 1.75        |
| Sørensen, 2001          | 0.35±0.86                                                    | 7           | -1.0±1.58 | 7          | 1.34            | 0.01, 2.67         |
| Bea, 2001               | 1) -0.44±2.28                                                | 453         | -0.5±2.45 | 474        | 0.06            | -0.24, 0.36        |
|                         | 2) -0.29±1.99                                                | 543         | -0.4±2.15 | 471        | 0.11            | -0.15, 0.37        |
| <b>Total</b>            |                                                              | <b>1018</b> |           | <b>971</b> | <b>0.13</b>     | <b>-0.06, 0.32</b> |
| Heterogeneity           | Chi <sup>2</sup> = 4.05, df =3 (P=0.26); I <sup>2</sup> =26% |             |           |            |                 |                    |
| Test for overall effect | Z=1.32 (P=0.19)                                              |             |           |            |                 |                    |

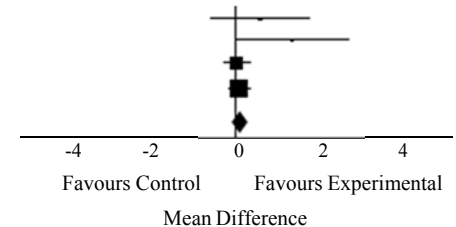

*Caption:* The forest plot of the meta-analyses of studies with longer times since menopause, which presents the mean differences and 95% confidence intervals for lean body mass between women taking hormone replacement therapy and women who were not taking hormone replacement therapy (control group).

**eTable 16.** Summary Meta-analysis of the Association Between Fair/Good Study Quality and Muscle Mass Outcomes

**Impact of Better Study Quality on Lean Body Mass by Study**

| Study Name              | Experimental                                                 |       | Control     |       | Mean Difference | 95% CI      |
|-------------------------|--------------------------------------------------------------|-------|-------------|-------|-----------------|-------------|
|                         | Mean + SD                                                    | Total | Mean + SD   | Total |                 |             |
| Hassager, 1989          | 1) 0.19±2.15                                                 | 32    | 0.33±2.13   | 58    | -0.14           | -1.06, 0.78 |
|                         | 2) 0.81±1.65                                                 | 20    | 0.33±2.13   | 58    | 0.48            | -0.43, 1.39 |
| Sipilä, 2001            | 1.1±4.25                                                     | 15    | -0.3±4.65   | 15    | 1.40            | -1.79, 4.59 |
| Sørensen, 2001          | 0.35±0.86                                                    | 7     | -1.0±1.58   | 7     | 1.34            | 0.01, 2.67  |
| Blackman, 2002          | 1.2±4.58                                                     | 19    | 0.4±3.93    | 14    | 0.8             | -2.11, 3.71 |
| Thorneycroft, 2007      | 1a) -0.12±1.87                                               | 97    | 0.19±1.55   | 94    | -0.31           | -0.80, 0.18 |
|                         | 1b) 0.26±1.56                                                | 95    | 0.19±1.55   | 94    | 0.07            | -0.37, 0.51 |
|                         | 1c) -0.04±1.51                                               | 89    | 0.19±1.55   | 94    | -0.23           | -0.67, 0.21 |
|                         | 2a) 0.55±1.48                                                | 86    | 0.19±1.55   | 94    | 0.36            | -0.08, 0.80 |
|                         | 2b) 0.1±1.47                                                 | 96    | 0.19±1.55   | 94    | -0.09           | -0.52, 0.34 |
|                         | 2c) 0.13±1.45                                                | 94    | 0.19±1.55   | 94    | -0.06           | -0.49, 0.37 |
|                         | 2d) 0.16±1.39                                                | 98    | 0.19±1.55   | 94    | -0.03           | -0.45, 0.39 |
|                         | <b>Total</b>                                                 |       | <b>1744</b> |       | <b>1755</b>     | <b>0.04</b> |
| Heterogeneity           | Chi <sup>2</sup> = 12.09, df=13 (P=0.52); I <sup>2</sup> =0% |       |             |       |                 |             |
| Test for overall effect | Z=0.60 (P=0.55)                                              |       |             |       |                 |             |

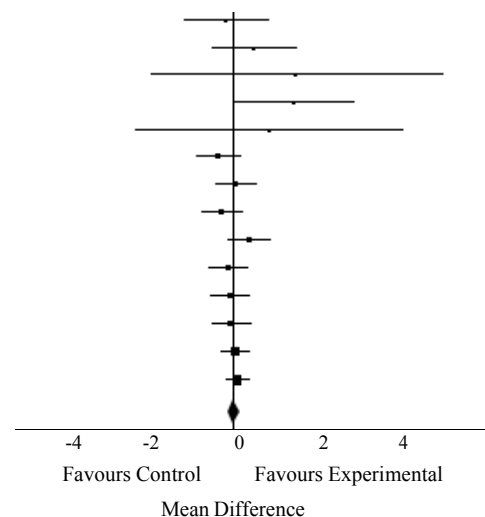

*Caption:* The forest plot of the meta-analyses of fair/good quality studies, which presents the mean differences and 95% confidence intervals for lean body mass between women taking hormone replacement therapy and women who were not taking hormone replacement therapy (control group).

**eTable 17.** Summary Meta-analysis of the Association Between Poor Study Quality and Muscle Mass Outcomes

**Impact of Poorer Study Quality on Lean Body Mass by Study**

| Study Name              | Experimental                                                |            | Control    |            | Mean Difference | 95% CI             |
|-------------------------|-------------------------------------------------------------|------------|------------|------------|-----------------|--------------------|
|                         | Mean + SD                                                   | Total      | Mean + SD  | Total      |                 |                    |
| Haarbo, 1991            | 1) -0.2±5.2                                                 | 19         | -0.7±3.85  | 24         | 0.5             | -2.30, 3.30        |
|                         | 2) 0.6±3.7                                                  | 19         | -0.7±3.85  | 24         | 1.30            | -1.00, 3.60        |
| Aloia, 1995             | -1.06±1.64                                                  | 30         | -0.75±1.59 | 28         | -0.31           | -1.14, 0.52        |
| Evans, 2001             | 1.1±1.9                                                     | 15         | 0.5±1.4    | 19         | 0.60            | -0.55, 1.75        |
| Jensen, 2003            | 0.18±1.77                                                   | 268        | -0.02±2.33 | 353        | 0.20            | -0.12, 0.52        |
| Kenny, 2005             | -0.3±3.37                                                   | 71         | -0.5±3.3   | 68         | 0.20            | -0.91, 1.31        |
| Pöllänen, 2007          | 1.00±4.00                                                   | 10         | -1.4±3.10  | 5          | 2.40            | -1.28, 6.08        |
| <b>Total</b>            |                                                             | <b>432</b> |            | <b>521</b> | <b>0.20</b>     | <b>-0.08, 0.48</b> |
| Heterogeneity           | Chi <sup>2</sup> = 4.21, df =6 (P=0.65); I <sup>2</sup> =0% |            |            |            |                 |                    |
| Test for overall effect | Z=1.40 (P=0.16)                                             |            |            |            |                 |                    |

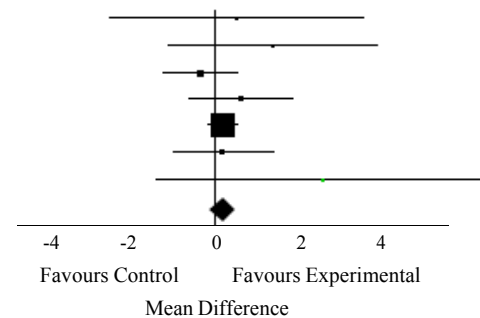

*Caption:* The forest plot of the meta-analyses of poor quality studies, which presents the mean differences and 95% confidence intervals for lean body mass between women taking hormone replacement therapy and women who were not taking hormone replacement therapy (control group).

**eTable 18.** Summary Meta-analysis of the Association Between DEXA Measurement and Muscle Mass Outcomes

**Impact of Use of DEXA Measurement on Lean Body Mass by Study**

| Study Name              | Experimental                                                 |             | Control    |             | Mean Difference | 95% CI             |
|-------------------------|--------------------------------------------------------------|-------------|------------|-------------|-----------------|--------------------|
|                         | Mean + SD                                                    | Total       | Mean + SD  | Total       |                 |                    |
| Evans, 2001             | 1.1±1.9                                                      | 15          | 0.5±1.4    | 19          | 0.60            | -0.55, 1.75        |
| Sørensen, 2001          | 0.35±0.86                                                    | 7           | -1.0±1.58  | 7           | 1.34            | 0.01, 2.67         |
| Blackman, 2002          | 1.2±4.58                                                     | 19          | 0.4±3.93   | 14          | 0.8             | -2.11, 3.71        |
| Jensen, 2003            | 0.18±1.77                                                    | 268         | -0.02±2.33 | 353         | 0.20            | -0.12, 0.52        |
| Kenny, 2005             | -0.3±3.37                                                    | 71          | -0.5±3.3   | 68          | 0.20            | -0.91, 1.31        |
| Thornycroft, 2007       | 1a) -0.12±1.87                                               | 97          | 0.19±1.55  | 94          | -0.31           | -0.80, 0.18        |
|                         | 1b) 0.26±1.56                                                | 95          | 0.19±1.55  | 94          | 0.07            | -0.37, 0.51        |
|                         | 1c) -0.04±1.51                                               | 89          | 0.19±1.55  | 94          | -0.23           | -0.67, 0.21        |
|                         | 2a) 0.55±1.48                                                | 86          | 0.19±1.55  | 94          | 0.36            | -0.08, 0.80        |
|                         | 2b) 0.1±1.47                                                 | 96          | 0.19±1.55  | 94          | -0.09           | -0.52, 0.34        |
|                         | 2c) 0.13±1.45                                                | 94          | 0.19±1.55  | 94          | -0.06           | -0.49, 0.37        |
| Bea, 2001               | 1) -0.44±2.28                                                | 453         | -0.5±2.45  | 474         | 0.06            | -0.24, 0.36        |
|                         | 2) -0.29±1.99                                                | 543         | -0.4±2.15  | 471         | 0.11            | -0.15, 0.37        |
| <b>Total</b>            |                                                              | <b>2031</b> |            | <b>2064</b> | <b>0.06</b>     | <b>-0.06, 0.18</b> |
| Heterogeneity           | Chi <sup>2</sup> = 12.17, df=13 (P=0.51); I <sup>2</sup> =0% |             |            |             |                 |                    |
| Test for overall effect | Z=1.01 (P=0.31)                                              |             |            |             |                 |                    |

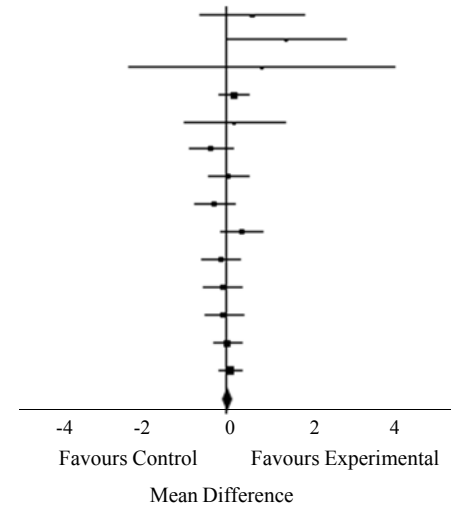

*Caption:* The forest plot of the meta-analyses of treatment arms utilizing DEXA measurement for muscle mass, which presents the mean differences and 95% confidence intervals for lean body mass between women taking hormone replacement therapy and women who were not taking hormone replacement therapy (control group).

**eTable 19.** Summary Meta-analysis of the Association Between Other Measurement and Muscle Mass Outcomes

**Impact of Use of Other Measurement Types on Lean Body Mass by Study**

| Study Name              | Experimental                                                |            | Control    |            | Mean Difference | 95% CI             |
|-------------------------|-------------------------------------------------------------|------------|------------|------------|-----------------|--------------------|
|                         | Mean + SD                                                   | Total      | Mean + SD  | Total      |                 |                    |
| Hassager, 1989          | 1) 0.19±2.15                                                | 32         | 0.33±2.13  | 58         | -0.14           | -1.06, 0.78        |
|                         | 2) 0.81±1.65                                                | 20         | 0.33±2.13  | 58         | 0.48            | -0.43, 1.39        |
| Aloia, 1995             | -1.06±1.64                                                  | 30         | -0.75±1.59 | 28         | -0.31           | -1.14, 0.52        |
| Sipilä, 2001            | 1.1±4.25                                                    | 15         | -0.3±4.65  | 15         | 1.40            | -1.79, 4.59        |
| Pöllänen, 2007          | 1.00±4.00                                                   | 10         | -1.4±3.10  | 5          | 2.40            | -1.28, 6.08        |
| <b>Total</b>            |                                                             | <b>107</b> |            | <b>164</b> | <b>0.07</b>     | <b>-0.43, 0.57</b> |
| Heterogeneity           | Chi <sup>2</sup> = 3.99, df =4 (P=0.41); I <sup>2</sup> =0% |            |            |            |                 |                    |
| Test for overall effect | Z=0.28 (P=0.78)                                             |            |            |            |                 |                    |

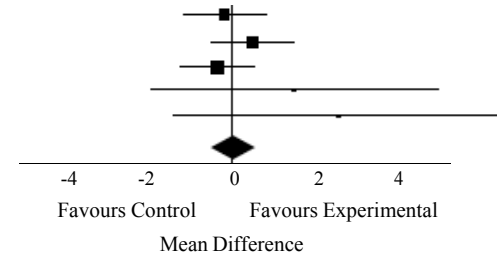

*Caption:* The forest plot of the meta-analyses of treatment arms utilizing other measurement of muscle mass, which presents the mean differences and 95% confidence intervals for lean body mass between women taking hormone replacement therapy and women who were not taking hormone replacement therapy (control group).

**eTable 20.** GRADE Assessment

| Quality Assessment  |                   |                             |                      |                           |              |                          |                      |                        | Summary of Findings  |
|---------------------|-------------------|-----------------------------|----------------------|---------------------------|--------------|--------------------------|----------------------|------------------------|----------------------|
| Outcome             | Exposure          | Participants (# of Studies) | Risk of Bias         | Inconsistency             | Indirectness | Imprecision <sup>1</sup> | Publication Bias     | Quality of Evidence    | Mean Difference (kg) |
| Lean body mass (kg) | E-only or E-P HRT | 4452 (12) <sup>2</sup>      | Serious <sup>3</sup> | Not serious ( $I^2=0\%$ ) | Not serious  | Serious <sup>4</sup>     | Serious <sup>5</sup> | ⊕⊕<br>LOW <sup>6</sup> | 0.06 (-0.05, 0.18)   |

<sup>1</sup> Studies were considered at risk for imprecision if they did not meet the optimal information size criteria (<400 cases, 200 per group), or if the optimal information size is met, but the 95% CI includes 0.

<sup>2</sup> Included data from 12 randomized controlled trials, with a duration of follow-up ranging from 6 months to 7.7±1.8 years, enrolling participants from 4 different countries.

<sup>3</sup> Study quality (assessed by the Cochrane Collaboration's tool for assessing risk of bias) ranged from poor to good. 50% of studies included in this analysis were of poor quality, 33% were fair, and 17% were good.

<sup>4</sup> Optimal information size was met, however overall 95% CI of the mean difference crosses 0.

<sup>5</sup> Visual inspection of the funnel plot and Begg's test (p=0.061) suggests publication bias, whereas the Egger's test (p=0.525) does not.

<sup>6</sup> Data from randomized controlled trials begin with a grade of "HIGH". Downgraded due to risk of bias, imprecision, and publication bias.



| <i>Stratified by dosage</i>    |                         |                           |                                              |             |                       |                            |                                      |                     |  |
|--------------------------------|-------------------------|---------------------------|----------------------------------------------|-------------|-----------------------|----------------------------|--------------------------------------|---------------------|--|
| <0.625 mg<br>E-only HRT        | 589 (3) <sup>7</sup>    | Not serious <sup>8</sup>  | Not serious<br>( <i>I</i> <sup>2</sup> =0%)  | Not serious | Serious <sup>9</sup>  | Not assessed <sup>10</sup> | ⊕⊕⊕<br><b>MODERATE</b> <sup>11</sup> | -0.01 (-0.29, 0.28) |  |
| ≥0.625 mg<br>E-only HRT        | 1118 (2) <sup>12</sup>  | Not serious <sup>13</sup> | Not serious<br>( <i>I</i> <sup>2</sup> =37%) | Not serious | Serious <sup>14</sup> | Not assessed <sup>15</sup> | ⊕⊕⊕<br><b>MODERATE</b> <sup>16</sup> | -0.07 (-0.42, 0.27) |  |
| <0.625 mg<br>E + any P<br>dose | 570 (1) <sup>17</sup>   | Not serious <sup>18</sup> | Not serious<br>( <i>I</i> <sup>2</sup> =0%)  | Not serious | Serious <sup>19</sup> | Not assessed <sup>20</sup> | ⊕⊕⊕<br><b>MODERATE</b> <sup>21</sup> | -0.06 (-0.30, 0.19) |  |
| ≥0.625 mg<br>E + any P<br>dose | 1553 (10) <sup>22</sup> | Not serious <sup>23</sup> | Not serious<br>( <i>I</i> <sup>2</sup> =0%)  | Not serious | Serious <sup>24</sup> | Serious <sup>25</sup>      | ⊕⊕<br><b>LOW</b> <sup>26</sup>       | 0.19 (-0.01, 0.39)  |  |

<sup>7</sup> Included data from 3 randomized controlled trials, with a duration of follow-up ranging from 2-3 years, enrolling participants from 2 different countries.

<sup>8</sup> Study quality ranged from poor to good. Thorneycroft et al. is a larger, good quality study with more participants contributing to this meta-analysis. Kenny et al. is a poor quality study with placebo women receiving progesterone as well. While ideally the control group would receive no hormones, due to the poor quality of this study, it is unlikely to impact the results.

<sup>9</sup> Optimal information size was met, however 95% CI of the mean difference crosses 0.

<sup>10</sup> Due to a small number of studies (n<10), publication bias was not formally assessed.

<sup>11</sup> Data from randomized controlled trials begin with a grade of "HIGH". Downgraded due to imprecision.

<sup>12</sup> Included data from 2 randomized controlled trials, with a duration of follow-up ranging from 2-6 years, enrolling participants from the USA.

<sup>13</sup> Study quality ranged from fair to good.

<sup>14</sup> Optimal information size was met, however 95% CI of the mean difference crosses 0.

<sup>15</sup> Due to a small number of studies (n<10), publication bias was not formally assessed.

<sup>16</sup> Data from randomized controlled trials begin with a grade of "HIGH". Downgraded due to imprecision.

<sup>17</sup> Included data from 1 randomized controlled trials, with a duration of follow-up of 2 years, enrolling participants from the USA.

<sup>18</sup> Study quality was good.

<sup>19</sup> Optimal information size was met, however 95% CI of the mean difference crosses 0.

<sup>20</sup> Due to a small number of studies (n<10), publication bias was not formally assessed.

<sup>21</sup> Data from randomized controlled trials begin with a grade of "HIGH". Downgraded due to imprecision.

<sup>22</sup> Included data from 10 randomized controlled trials, with a duration of follow-up ranging from 6 months to 6 years, enrolling participants from 4 different countries.

<sup>23</sup> Study quality ranged from poor to good. 60% of studies included in this analysis were of fair/good quality.

<sup>24</sup> Optimal information size was met, however 95% CI of the mean difference crosses 0.

<sup>25</sup> Visual inspection of the funnel plot suggests publication bias.

<sup>26</sup> Data from randomized controlled trials begin with a grade of "HIGH". Downgraded due to imprecision and publication bias.

| <i>Stratified by follow-up length</i> |                        |                           |                                             |             |                       |                            |     |                               |                    |
|---------------------------------------|------------------------|---------------------------|---------------------------------------------|-------------|-----------------------|----------------------------|-----|-------------------------------|--------------------|
| Shorter length                        | 1644 (6) <sup>27</sup> | Not serious <sup>28</sup> | Not serious<br>( <i>I</i> <sup>2</sup> =0%) | Not serious | Serious <sup>29</sup> | Not assessed <sup>30</sup> | ⊕⊕⊕ | <b>MODERATE</b> <sup>31</sup> | 0.00 (-0.16, 0.16) |
| Longer length                         | 2759 (4) <sup>32</sup> | Serious <sup>33</sup>     | Not serious<br>( <i>I</i> <sup>2</sup> =0%) | Not serious | Serious <sup>34</sup> | Not assessed <sup>35</sup> | ⊕⊕  | <b>LOW</b> <sup>36</sup>      | 0.10 (-0.06, 0.27) |

<sup>27</sup> Included data from 6 randomized controlled trials, with a duration of follow-up ranging from 6 months to 2 years, enrolling participants from 4 different countries

<sup>28</sup> Study quality ranged from poor to good. 66% were fair or good, 33% were poor.

<sup>29</sup> Optimal information size was met, however overall 95% CI of the mean difference crosses 0.

<sup>30</sup> Due to a small number of studies (n<10), publication bias was not formally assessed.

<sup>31</sup> Data from randomized controlled trials begin with a grade of "HIGH". Downgraded due to imprecision.

<sup>32</sup> Included data from 4 randomized controlled trials, with a duration of follow-up ranging from 2.9 ±1.1-6 years, enrolling participants from 2 different countries.

<sup>33</sup> Study quality ranged from poor to fair. 75% were of poor quality.

<sup>34</sup> Optimal information size was met, however overall 95% CI of the mean difference crosses 0.

<sup>35</sup> Due to a small number of studies (n<10), publication bias was not formally assessed.

<sup>36</sup> Data from randomized controlled trials begin with a grade of "HIGH". Downgraded due to risk of bias and imprecision.

| <i>Stratified by time since menopause</i> |                        |                       |                                              |             |                       |                            |    |                   |                    |
|-------------------------------------------|------------------------|-----------------------|----------------------------------------------|-------------|-----------------------|----------------------------|----|-------------------|--------------------|
| Shorter                                   | 2092 (5) <sup>37</sup> | Serious <sup>38</sup> | Not serious<br>( <i>I</i> <sup>2</sup> =0%)  | Not serious | Serious <sup>39</sup> | Not assessed <sup>40</sup> | ⊕⊕ | LOW <sup>41</sup> | 0.01 (-0.13, 0.16) |
| Longer                                    | 1989 (3) <sup>42</sup> | Serious <sup>43</sup> | Not serious<br>( <i>I</i> <sup>2</sup> =26%) | Not serious | Serious <sup>44</sup> | Not assessed <sup>45</sup> | ⊕⊕ | LOW <sup>46</sup> | 0.16 (-0.10, 0.42) |

<sup>37</sup> Included data from 5 randomized controlled trials, with a duration of follow-up ranging from 6 months to 5 years, enrolling participants from 4 different countries.

<sup>38</sup> Study quality ranged from poor to good. 80% were of poor quality.

<sup>39</sup> Optimal information size was met, however 95% CI of the mean difference crosses 0.

<sup>40</sup> Due to a small number of studies (n<10), publication bias was not formally assessed.

<sup>41</sup> Data from randomized controlled trials begin with a grade of "HIGH". Downgraded due to risk of bias and imprecision.

<sup>42</sup> Included data from 3 randomized controlled trials, with a duration of follow-up upto 6 years, enrolling participants from 2 different countries.

<sup>43</sup> Study quality ranged from poor to fair. Although 67% were of fair quality, this was downgraded due to poorly reported information.

<sup>44</sup> Optimal information size was met, however 95% CI of the mean difference crosses 0.

<sup>45</sup> Due to a small number of studies (n<10), publication bias was not formally assessed.

<sup>46</sup> Data from randomized controlled trials begin with a grade of "HIGH". Downgraded due to risk of bias and imprecision.

| <i>Stratified by study quality</i> |                        |             |                                             |             |                       |                            |     |                               |                    |
|------------------------------------|------------------------|-------------|---------------------------------------------|-------------|-----------------------|----------------------------|-----|-------------------------------|--------------------|
| Fair/Good                          | 3449 (6) <sup>47</sup> | Not serious | Not serious<br>( <i>I</i> <sup>2</sup> =0%) | Not serious | Serious <sup>48</sup> | Not assessed <sup>49</sup> | ⊕⊕⊕ | <b>MODERATE</b> <sup>50</sup> | 0.04 (-0.09, 0.17) |
| Poor                               | 952 (6) <sup>51</sup>  | Serious     | Not serious<br>( <i>I</i> <sup>2</sup> =0%) | Not serious | Serious <sup>52</sup> | Not assessed <sup>53</sup> | ⊕⊕  | <b>LOW</b> <sup>54</sup>      | 0.20 (-0.08, 0.48) |

<sup>47</sup> Included data from 6 randomized controlled trials, with a duration of follow-up ranging from 6 months to 6 years, enrolling participants from 4 different countries.

<sup>48</sup> Optimal information size was met, however 95% CI of the mean difference crosses 0.

<sup>49</sup> Due to a small number of studies (n<10), publication bias was not formally assessed.

<sup>50</sup> Data from randomized controlled trials begin with a grade of "HIGH". Downgraded due to inconsistency and imprecision.

<sup>51</sup> Included data from 6 randomized controlled trials, with a duration of follow-up ranging from 6 months to 5 years, enrolling participants from 4 different countries.

<sup>52</sup> Optimal information size was met, however 95% CI of the mean difference crosses 0.

<sup>53</sup> Due to a small number of studies (n<10), publication bias was not formally assessed.

<sup>54</sup> Data from randomized controlled trials begin with a grade of "HIGH". Downgraded due to risk of bias, inconsistency, and imprecision.

| <i>Stratified by type of muscle measurement</i> |       |                        |                           |                                             |             |                       |                            |                                      |                    |
|-------------------------------------------------|-------|------------------------|---------------------------|---------------------------------------------|-------------|-----------------------|----------------------------|--------------------------------------|--------------------|
|                                                 | DEXA  | 4095 (7) <sup>55</sup> | Not serious <sup>56</sup> | Not serious<br>( <i>I</i> <sup>2</sup> =0%) | Not serious | Serious <sup>57</sup> | Not assessed <sup>58</sup> | ⊕⊕⊕<br><b>MODERATE</b> <sup>59</sup> | 0.06 (-0.06, 0.18) |
|                                                 | Other | 271 (4) <sup>60</sup>  | Serious <sup>61</sup>     | Not serious<br>( <i>I</i> <sup>2</sup> =0%) | Not serious | Serious <sup>62</sup> | Not assessed <sup>63</sup> | ⊕⊕<br><b>LOW</b> <sup>64</sup>       | 0.07 (-0.43, 0.57) |

<sup>55</sup> Included data from 7 randomized controlled trials, with a duration of follow-up ranging from 6 months to 6 years, enrolling participants from 3 different countries.

<sup>56</sup> Study quality ranged from poor to good. 57% were of fair/good quality.

<sup>57</sup> Optimal information size was met, however 95% CI of the mean difference crosses 0.

<sup>58</sup> Due to a small number of studies (n<10), publication bias was not formally assessed.

<sup>59</sup> Data from randomized controlled trials begin with a grade of "HIGH". Downgraded due to imprecision.

<sup>60</sup> Included data from 4 randomized controlled trials, with a duration of follow-up ranging from 12 months to 3 years, enrolling participants from 3 different countries.

<sup>61</sup> Study quality ranged from poor to good. 50% were of poor quality.

<sup>62</sup> Optimal information size was met, however 95% CI of the mean difference crosses 0.

<sup>63</sup> Due to a small number of studies (n<10), publication bias was not formally assessed.

<sup>64</sup> Data from randomized controlled trials begin with a grade of "HIGH". Downgraded due to risk of bias and imprecision.

eFigure. Funnel Plot for Assessment of Publication Bias

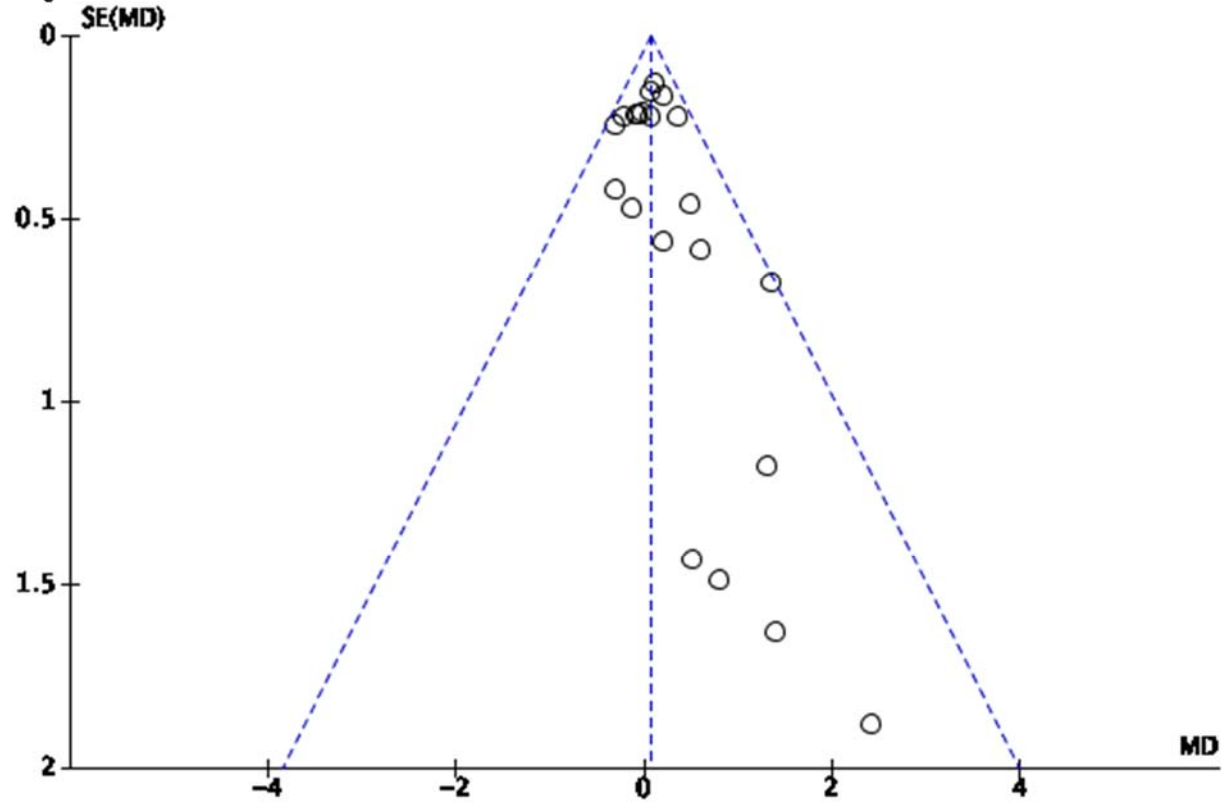

*Caption:* A visual inspection of the funnel plot of effect size and precision presents some asymmetry, indicating potential publication bias.
